## Temperature–oxygen interactions in Antarctic nudibranch egg masses

H. Arthur Woods<sup>1,\*</sup> and Amy L. Moran<sup>2</sup>

<sup>1</sup>Division of Biological Sciences, University of Montana, Missoula, MT 59812, USA and <sup>2</sup>Department of Biological Sciences, Clemson University, Clemson, SC 29634, USA

\*Author for correspondence (e-mail: art.woods@mso.umt.edu)

Accepted 8 January 2008

### SUMMARY

The Southern Ocean is one of the coldest, most stable marine environments on Earth and represents a unique environment for investigating metabolic consequences of low temperature. Here we test predictions of a new diffusion–reaction model of O<sub>2</sub> distributions in egg masses, using egg masses of the Antarctic nudibranch mollusk, *Tritonia challengeriana*. When warmed from –1.5° to +1.5°C, embryos of *T. challengeriana* showed large increases in O<sub>2</sub> consumption (Q<sub>10</sub> values of 9.6–30.0). Oxygen electrode measurements in intact masses showed, however, that O<sub>2</sub> levels were high throughout and virtually unaffected by temperature. The model suggested that both effects stemmed from very low metabolic densities in egg masses. Detailed morphological measurements of egg masses of *T. challengeriana* and a temperate congener, *T. diomedea*, revealed large differences in structure that may be related to O<sub>2</sub> availability. Egg masses of *T. challengeriana* were approximately twice as thick. However, the most dramatic effects were observed in embryos: embryos of *T. challengeriana* were >32 times larger (by volume) than embryos of *T. diomedea*. Antarctic embryos also were contained singly in large egg capsules (~500 µm diameter). Consequently, Antarctic embryos occurred at much lower densities, with very low metabolic densities.

Key words: Antarctica, Southern Ocean, McMurdo Sound, oxygen, diffusion, egg mass, nudibranch, marine, temperature, global warming, size, polar gigantism, *Tritonia*.

### INTRODUCTION

Temperature has strong effects on the oxygen budget of ectothermic organisms through its effect on metabolic rate (=O<sub>2</sub> consumption). At higher temperatures, ectotherms can experience O<sub>2</sub> deficits if metabolic demand outstrips mechanisms of transport; thus high temperature, *via* effects on O<sub>2</sub> supply, places both short-term constraints on the environments that ectotherms can exploit and long-term evolutionary constraints on possible physiologies and morphologies. Cold temperatures, by contrast, affect O<sub>2</sub> supply–demand relationships by depressing O<sub>2</sub> demand from metabolism while potentially having little effect on O<sub>2</sub> supply by diffusion (Dejours, 1981; Clarke and Johnston, 1999; Woods, 1999; Peck and Conway, 2000; Peck, 2002; Pörtner, 2001; Pörtner, 2002). Thus, ectotherms in cold environments may be released from some constraints on physiology and form experienced at warmer temperatures.

The Southern Ocean is one of the coldest, most stable marine environments on Earth (Sidell, 2000) and represents a unique environment for investigating metabolic consequences of low temperature. Sea temperatures near the Ross Ice Shelf at McMurdo Station are approx. –1.9°C year round (Littlepage, 1965), and have been <5°C for at least 10–14 MY (Sidell, 2000). Oxygen levels are high throughout the water column (Littlepage, 1965). This combination of conditions may have released Antarctic ectotherms from O<sub>2</sub>-imposed constraints commonly experienced by warmer-temperature organisms. Several examples support this idea, including low erythrocyte counts of Antarctic notothenioid fish (Eastman, 1993), evolutionary loss of respiratory proteins in some Antarctic icefish (Ruud 1954; Cocca et al., 1995), and gigantism of many Southern Ocean invertebrates (Chapelle and Peck, 1999).

Here we examine O<sub>2</sub> supply–demand relationships in gelatinous egg masses of Antarctic nudibranchs (Mollusca). Gelatinous masses

may serve a number of functions: retention of embryos in favorable microhabitats, chemical or structural protection from predation, reduction of the vulnerable planktonic larval phase, and protection from physical threats (Pechenik, 1979; Rumrill 1990; Rawlings, 1999; Woods and DeSilets, 1999; Przeslawski, 2004). In temperate waters, metabolism by embryos can establish steep O<sub>2</sub> gradients in egg masses. Hypoxia or anoxia has been observed directly, or inferred from developmental asynchrony of embryos, in egg masses of frogs (Seymour and Bradford, 1995; Seymour et al., 1995; Mitchell and Seymour, 2003), fish (Taylor, 1971), mollusks (Booth, 1995; Cohen and Strathmann, 1996; Moran and Woods, 2007), crustaceans (Fernández et al., 2003) and polychaetes (Strathmann, 2000), and may reduce the quality of juveniles, kill embryos directly (Strathmann and Strathmann, 1995), or increase mortality by prolonging development and exposure to benthic predators (Pechenik, 1999). These effects are important because early-stage survival and performance strongly influence population dynamics in marine and aquatic systems (Thorson, 1946; Strathmann, 1985; Roughgarden et al., 1987; Pechenik, 1999; Underwood and Keough, 2000; Moran and Emler, 2001).

The preceding paper (Woods and Moran, 2008) described a numerical model capable of predicting full spatial and temporal profiles of oxygen in egg masses. The work reported here tests predictions of the model in two ways. The first focuses on intraspecific effects: as an egg mass is warmed, O<sub>2</sub> gradients should become steeper – i.e. central O<sub>2</sub> levels should be depressed. This effect should be especially strong in Antarctic egg masses, because recent studies suggest that metabolism in polar organisms can be much more temperature sensitive than in temperate or tropical organisms. Peck and Prothero-Thomas (Peck and Prothero-Thomas, 2002), for example, found that in larvae of the Antarctic sea star *Odontaster validus*, O<sub>2</sub> consumption rates increased by a factor of nearly 1.5 over

a temperature range between  $-0.5$  and  $2.0^{\circ}\text{C}$  ( $Q_{10}$  of  $\sim 4.4$ ). Likewise, Bosch et al. (Bosch et al., 1987) and Stanwell-Smith and Peck (Stanwell-Smith and Peck, 1998) found that the effect of temperature on developmental rate in polar echinoderms was much stronger than for temperate or tropical species:  $Q_{10}$  values of 10–15 between  $-2^{\circ}\text{C}$  to  $+2^{\circ}\text{C}$ , far outside the normal biological range (2–3). A counterexample is provided by the data reported in the previous paper (Woods and Moran, 2008) on another polar echinoderm, *Sterechinus neumayeri*, which showed that it had a low  $Q_{10}$  ( $\sim 1.5$ ).

How temperature effects on metabolism translate into temperature sensitivity of  $\text{O}_2$  distributions in egg masses depends on an assumption of the model – that diffusive transport of  $\text{O}_2$  is indeed insensitive to temperature. This assumption is derived from theoretical and empirical studies of molecules diffusing in substances like water. For molecules in biological structures, such as egg mass gel, the temperature sensitivity of diffusive transport also depends on temperature sensitivity of structural properties. For egg masses of both temperate and Antarctic *Tritonia*, we directly measured temperature effects on  $\text{O}_2$  diffusion coefficients (Woods and Moran, 2008), finding negligible increases across the same temperature ranges that stimulated large increases in metabolic rates, thus confirming the assumption of temperature-insensitivity of  $\text{O}_2$  transport. Here we measure all remaining model parameters – embryo metabolic rates, diffusion coefficients of  $\text{O}_2$  and radial profiles of  $\text{O}_2$  – at both ambient water temperature of McMurdo Sound ( $-1.8^{\circ}\text{C}$ ) and slightly warmer temperatures ( $+1.5$ – $2^{\circ}\text{C}$ ) in egg masses of the Antarctic dendronotid nudibranch *Tritonia challengeriana* Bergh 1884. Using these measurements as parameters, we show that the model (1) accurately predicts radial  $\text{O}_2$  profiles in egg masses of *T. challengeriana* and (2) explains the puzzling temperature insensitivity of these profiles.

The second model test is interspecific. We recently published work on  $\text{O}_2$  distributions in egg masses of *Tritonia diomedea* Bergh 1894 (Moran and Woods, 2007), a temperate congener of *T. challengeriana* that inhabits subtidal areas along the West Coast of North America. Between  $12$  and  $21^{\circ}\text{C}$ , embryo metabolic rates rose approximately twofold ( $Q_{10}$  2.1–2.5). For egg masses containing early-cleavage embryos, central  $\text{O}_2$  levels were high (60–70% of air saturation) and only slightly affected by temperature. In egg masses containing veligers, central  $\text{O}_2$  levels were lower (0–40% of air saturation) and more sensitive to temperature – approx. 30% of air saturation at  $12^{\circ}\text{C}$  and  $<10\%$  at  $21^{\circ}\text{C}$ . The gross morphology of *T. diomedea* masses has been described by several authors (e.g. Hurst, 1967; Kempf and Willows, 1977; Lee and Strathmann, 1998), and we add more detailed descriptions in this study.

Our measurements allow detailed physiological comparisons of Antarctic and temperate egg masses. The model predicts that  $\text{O}_2$  constraints observed *T. diomedea* (Moran and Woods, 2007) should disappear at low temperatures in the Southern Ocean. Specifically, it predicts that Antarctic egg masses will (1) have higher  $\text{O}_2$  levels, (2) be thicker (i.e. larger radius), (3) contain embryos at higher densities, and (4) exhibit tougher, less  $\text{O}_2$ -permeable egg-mass gel, without incurring an increased  $\text{O}_2$  deficit relative to masses of their warmer-water relatives. Our data supported only the first two predictions, although several additional observations, particularly on embryo size and density, suggest functional reasons for deviations from predictions 3 and 4.

## MATERIALS AND METHODS

### Natural history

*Tritonia diomedea* Bergh 1894 and *Tritonia challengeriana* Bergh 1884 are congeneric dendronotid nudibranchs (genus *Tritonia* Cuvier 1797; family Tritoniidae; suborder Dendronotina) that are similar to

each other in adult size and appearance (Fig. 1). *T. diomedea* has planktonic larvae and a broad distribution in the temperate northern Pacific, from Alaska to Panama (McDonald, 1983). *T. diomedea* is subtidal and feeds on soft corals (specifically *Ptilosarcus gurneyi* and *Virgularia* sp.) (McDonald and Nybakken, 1980). The biology of *T. challengeriana* is poorly known. Recent studies have synonymized this species with *Tritonia antarctica* Bergh 1884 (Wägele, 1995; Schrödl, 2003), and this taxon has been reported from the Antarctic Peninsula, Patagonia, the Weddell Sea, South Georgia, the Falkland Islands, and Signy Island (Odhner, 1926; Wägele, 1995; Barnes and Bullough, 1996; Schrödl, 2003). Food sources of *T. challengeriana* are unknown, though it probably feeds on octocorals (McClintock et al., 1994; Barnes and Bullough, 1996). The developmental mode of *T. challengeriana* is also unknown, but the large egg size and larval morphology reported here suggest that it produces crawl-away juveniles or larvae with a short dispersive period.

The preceding paper (Woods and Moran, 2008) describes collection and holding methodology.

### Egg mass morphology

Egg masses of the two species differed in size and overall morphology, and measurement techniques varied accordingly. For whole egg masses of *T. challengeriana*, which approximated long cylinders, we measured ‘height’ (the longest diameter) and ‘thickness’ (perpendicular to the height) in two ways: using calipers to directly measure intact egg masses (*T. challengeriana*), and by sectioning egg masses and measuring parameters from calibrated digital microphotographs.

For *T. challengeriana*, sections (Fig. 2) were cut with a razor blade along the ‘height’ axis, perpendicular to the long axis of the egg mass cylinder. Sections were photographed using a Wild M5A stereomicroscope and Nikon Coolpix 900 digital camera. We measured embryo length (longest diameter), embryo width (perpendicular to longest diameter), egg volume (estimated from length, width, and assuming the shape of a prolate spheroid), capsule length and width, capsule volume (estimated as for embryos), egg mass ‘height’ (longest diameter), mass ‘width’ (perpendicular to longest diameter) and mass wall thickness. We also measured the average thickness of the outer mucous covering of masses (see Fig. 2). All microscopic measures were made in BioSuite (Olympus, Inc.) on calibrated micrographs. On a subset of egg masses we also measured embryo density by counting embryos in mass sections of known length. Segment volume was estimated by multiplying cross-sectional area by section length. Embryo density ( $\text{mm}^{-3}$ ) was calculated by dividing total number of embryos by section volume ( $\text{mm}^3$ ). For each mass, average embryo density was calculated from one to three sections.

*T. diomedea* had smaller, more gelatinous egg strings than *T. challengeriana*, requiring slightly different methods. To measure gross egg mass morphology, we (1) measured masses directly using a calibrated ocular micrometer or (2) photographed whole masses under a calibrated stereomicroscope and measured parameters from digital images. Because cut *T. diomedea* masses did not hold their shape, cross-sectional diameters were impossible to measure directly. Instead, we assumed they were ellipsoid cylinders for volume calculations. All other measurements were made from microphotographs as described for *T. challengeriana*.

### Embryo metabolic rates

Rates of  $\text{O}_2$  consumption by embryos of *T. challengeriana* were measured using the end-point determination  $\mu\text{BOD}$  method (Marsh and Manahan, 1999) with some modification (see Moran and

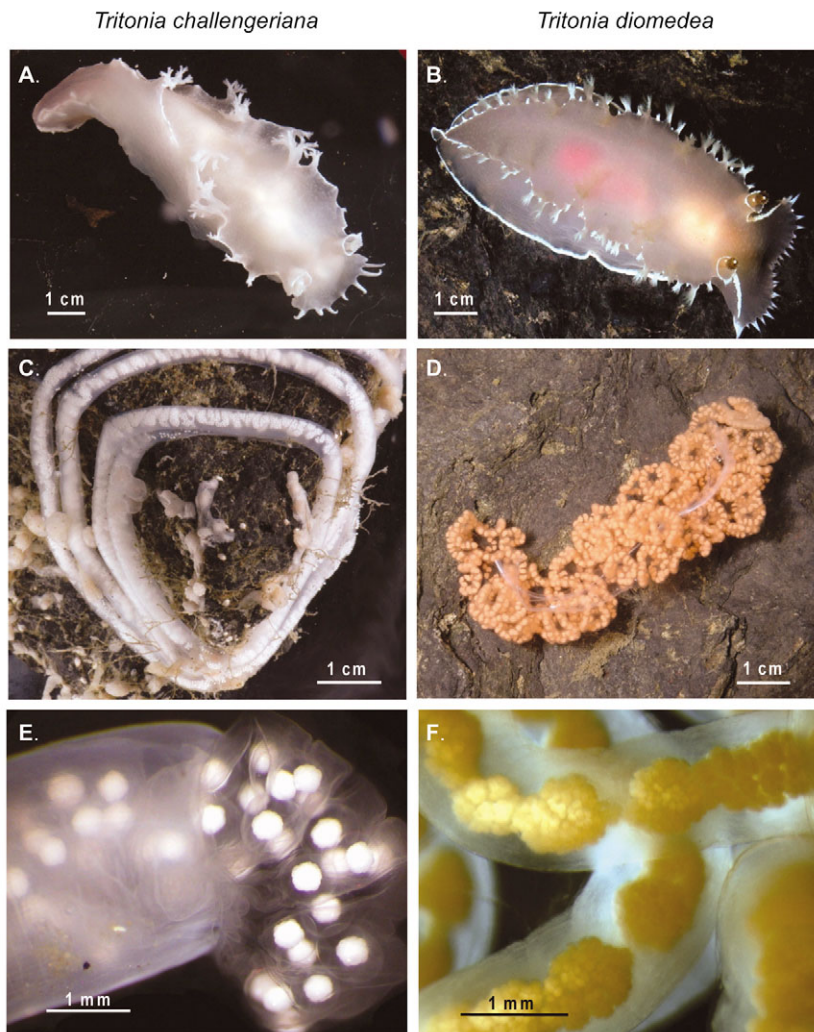

Fig. 1. Adults and egg masses of *Tritonia challengeriana* (Antarctic; A,C,E) and *T. diomedea* (temperate; B,D,F). (A,B) Adults. (C,D) Egg masses (macro view). The egg mass of *T. challengeriana* (C) is *in situ*; the egg mass of *T. diomedea* was removed from its substrate with a razor blade. (E) Cut section of a egg mass of *T. challengeriana* with embryos spilling out of the cut end, showing gelatinous egg string in which embryos are contained. White spheroids are individual embryos at an early cleavage stage. (F) Uncut sections of coiled egg mass of *T. diomedea*, showing embryos (small yellow dots) in egg capsules (clusters of yellow embryos) contained within the mucous sleeve.

(Palmer Station LTER sea temperature dataset, <http://pal.lternet.edu/>).

#### Oxygen profiles in egg masses and capsules

$P_{O_2}$  in egg masses of *T. challengeriana* was measured using Clark-style  $O_2$  microelectrodes (10, 25 or 50  $\mu\text{m}$  tips; Unisense, Aarhus, Denmark) connected to a picoammeter (model PA2000, Unisense). Electrodes were calibrated, at experimental temperature, before and after each set of measurements in seawater bubbled with air or pure  $N_2$ . Calibration water was held at constant temperature with a water-jacketed calibration cell connected to a recirculating water bath. Picoammeter output was logged once per second. Water temperature was also logged using a T-type thermocouple connected to a thermocouple meter (TC-1000, Sable Systems, Las Vegas, NV, USA). Thermocouples were calibrated in a seawater ice bath ( $-1.9^\circ\text{C}$ ). Pieces of egg masses, or individual egg capsules (in general, each capsule contained a single embryo), were submerged and  $P_{O_2}$  values were measured as described (Moran and Woods, 2007).

Paired pieces of egg mass (several cm long, cut ends tied with dental floss) were equilibrated overnight in air-bubbled seawater at either  $-1.5$  or  $+2.0^\circ\text{C}$  ( $N=7$  pairs). Subsequently, pieces were transferred to the temperature-controlled stage described (Moran and Woods, 2007) and pinned onto a piece of Nitex mesh. A micromanipulator was used to position an oxygen electrode at the egg mass surface, and the tip was advanced in increments of 0.5 mm to the center of the mass. In separate experiments, individual egg capsules that had been removed from egg masses were pierced with a 10  $\mu\text{m}$  tip electrode and lifted from the substrate (to avoid substrate-induced boundary layers).

#### Modeling oxygen profiles in egg masses of *T. challengeriana*

Measurements of egg-mass morphology, embryo metabolic rates, and  $O_2$  diffusion coefficients were used to parameterize the model developed in the preceding paper (Woods and Moran, 2008). Our interests were primarily in determining how similar modeled radial profiles were to measured profiles across temperatures. All modeling was done in the R statistical package (v2.3.1), as described previously.

## RESULTS

### Egg mass morphology – *T. challengeriana*

Egg masses were elongate white- or off-white cylindrical tubes affixed to substrate along one axis. Embryos could be seen faintly inside masses, but the outer mucous covering was almost opaque

Woods, 2007). Encapsulated embryos were removed from egg masses, placed in freshly filtered (0.2  $\mu\text{m}$  pore diameter) seawater, and allowed to acclimate to the experimental temperature for 2 h. They were then pipetted into temperature-equilibrated glass microrespiration chambers (500–700  $\mu\text{l}$ ), and vials were capped and held at the experimental temperature for 5–14 h (total  $O_2$  depletion  $<20\%$  of fully saturated values). Subsequently,  $\sim 300$   $\mu\text{l}$  of water from each vial was removed with a temperature-equilibrated gastight syringe and injected into a respiration cell (MC-100, Strathkelvin, Glasgow, UK) containing a Clark-style oxygen microelectrode (Strathkelvin), kept at temperature with a recirculating water bath. Per-embryo respiration rate was calculated as the slope of the least-squares regression line of total respiration per vial plotted against number of embryos per vial (Marsh and Manahan, 1999).

Metabolism was measured at three developmental stages and two temperatures. Because development in *T. challengeriana* is very long ( $\geq 1$  year; H.A.W. and A.L.M., unpublished data), we used embryos from field-collected masses assigned to one of three stages: early (gastrula), mid (unshelled, ciliated veliger) and late (shelled, ciliated, and with a visible ciliated foot). For all three stages we compared metabolic rates at two temperatures,  $-1.5^\circ\text{C}$  and  $+1.5^\circ\text{C}$ . The low temperature is close to natural temperatures ( $-1.8^\circ\text{C}$ ); the warmer temperature ( $+1.5^\circ\text{C}$ ) represents summer temperatures animals might experience in more northerly parts of the Antarctic peninsula



Table 1. Morphology of *Tritonia challengeriana* and *T. diomedea*

|                                              | <i>T. challengeriana</i> |    | <i>T. diomedea</i>  |   |
|----------------------------------------------|--------------------------|----|---------------------|---|
|                                              | Mean $\pm$ s.e.m.        | N  | Mean                | N |
| Short diameter (mm)                          | 2.88 $\pm$ 0.07          | 9  | –                   |   |
| Long diameter (mm)                           | 3.12 $\pm$ 0.07          | 9  | 1.62 $\pm$ 0.09     | 4 |
| Mass cross-sectional area (mm <sup>2</sup> ) | 6.73 $\pm$ 0.73          | 7  | –                   |   |
| Mass wall thickness ( $\mu$ m)               | 183 $\pm$ 17.4           | 15 | –                   |   |
| Embryo diameter ( $\mu$ m)                   | 339 $\pm$ 6.8            | 15 | 102.3 $\pm$ 1.0     | 4 |
| Embryo volume (mm <sup>3</sup> )             | 0.015 $\pm$ 0.001        | 15 | 0.0037 $\pm$ 0.0004 | 4 |
| Embryo density (mm <sup>-3</sup> )           | 9.24 $\pm$ 0.96          | 6  | 215.2 $\pm$ 39.3    | 4 |
| Embryo density, inner (mm <sup>-3</sup> )    | 14.45 $\pm$ 1.55         | 7  | –                   |   |
| Capsule packing density (% filling)          | 83 $\pm$ 8               | 5  | –                   |   |

Values are means  $\pm$  s.e.m.

– so the details of interior morphology could not be seen. Masses were laid in either loose spirals (Fig. 1C) or, less commonly, wrapped around small rocks, sponges, or hydroids. Embryos were white to off-white and each was contained individually in a large, transparent, ellipsoid capsule. Within the mass, embryo capsules were contained in a long, loosely coiled membranous sheath (Fig. 2A). Capsules were loose within the membranous string; once egg masses were cut, capsules fell freely out. Capsules were densely packed within the mass (Fig. 2A). Measurements of embryo length and volume, capsule diameter and volume, mass diameter and cross-sectional area, and embryo density are given in Table 1.

#### Egg mass morphology – *T. diomedea*

Morphological data (Table 1) were consistent with previous descriptions (Hurst, 1967; Strathmann, 1985; Lee and Strathmann, 1998). Overall, *T. diomedea* had narrower egg cords than *T. challengeriana*. Mass coverings of *T. challengeriana* were tough and translucent whereas those of *T. diomedea* were transparent and jelly-like. *T. diomedea* also had substantially smaller embryos, many more embryos per capsule, and much higher embryo densities than *T. challengeriana* (Table 1).

#### Embryo metabolic rates – *T. challengeriana*

Metabolic rates increased with both embryo age and temperature (Fig. 3). O<sub>2</sub> consumption ranged from 3.4–51.1 pmol embryo<sup>-1</sup> h<sup>-1</sup> and respiration rates were highly temperature-sensitive; for the three developmental stages we examined, Q<sub>10</sub> values of respiration rate ranged from 9.6 to 30.0, depending on developmental stage. Respiration rates of *T. diomedea* are given elsewhere (Moran and Woods, 2007).

#### Oxygen profiles in egg masses and capsules – *T. challengeriana*

O<sub>2</sub> levels in egg masses of *T. challengeriana* were high throughout and only slightly affected by temperature (Fig. 4). A linear mixed-effects model (S-Plus v6.2) with radial position and temperature as main effects and mass identity as a random effect, showed that temperature had a statistically significant effect on O<sub>2</sub> levels ( $F_{1,46}=26.7$ ,  $P<0.001$ ). Masses used in this experiment contained embryos of various developmental stages, though most were early to mid-veligers; embryo stage had no effect on level of O<sub>2</sub> depression. Capsules freed from egg masses had very small O<sub>2</sub> gradients from surrounding seawater to intracapsular fluid. For each of seven masses, gradients were measured on three separate capsules and averaged, giving a mean gradient ( $\pm$ s.e.m.) of 0.20 $\pm$ 0.11 kPa. This value represents a 1% drop from air-saturated

values (21 kPa). Oxygen profiles in egg masses and across capsule walls of *T. diomedea* are given in Moran and Woods (Moran and Woods, 2007).

#### Modeling oxygen profiles in egg masses of *T. challengeriana*

The cylindrical diffusion–reaction model developed in the previous paper requires four parameters – egg mass radius, O<sub>2</sub> diffusion coefficient, metabolic density (a combination of embryo density and embryo metabolic rates), and a term describing the half-saturation constant ( $K_m$ ) of metabolism. We measured all parameters directly except for  $K_m$ . For the simulations, we assumed a very low  $K_m$  (=20 nmol O<sub>2</sub> cm<sup>-3</sup>), based on older studies of embryo O<sub>2</sub> sensitivity (e.g. Tang and Gerard, 1932; Yanigasawa, 1975; Palumbi and Johnson, 1982). Under all combinations of embryo age and temperature, simulated profiles showed high levels of O<sub>2</sub> throughout the egg masses (Fig. 5), similar to observed radial profiles (Fig. 4). Early- and mid-stage embryos in colder conditions had almost no central O<sub>2</sub> depression, and the warmer conditions led to only slight additional O<sub>2</sub> depression. Late-stage embryos showed a larger but still modest effect of temperature.

One systematic difference between modeled and measured profiles was shape; modeled profiles showed smoothly declining O<sub>2</sub> levels whereas measured profiles showed sharper decreases near the egg-mass surface and flat internal O<sub>2</sub> profiles, suggesting that more resistance to O<sub>2</sub> flux is localized in the egg-mass wall or external boundary layers and less in the packed capsules. Stirring by embryos may also flatten internal O<sub>2</sub> profiles.

#### DISCUSSION

The cold, well-oxygenated waters of Antarctica provide an ideal natural experiment for assessing how changes in O<sub>2</sub> supply–demand relationships affect organismal physiology. We took advantage of this ‘experiment’ to examine the oxygen biology of Antarctic nudibranch egg masses. Analyses were carried out in the context of the reaction–diffusion model developed in the preceding paper. The model’s predictions were driven by the twin assumptions, now confirmed, of (1) high temperature sensitivity of metabolic O<sub>2</sub> consumption and (2) low temperature sensitivity of diffusive O<sub>2</sub> transport. The present paper uses detailed measurements of egg-mass morphology and physiology of the Antarctic nudibranch *Tritonia challengeriana* to evaluate two model-derived hypotheses. The first is intraspecific, focusing on how warming affects O<sub>2</sub> profiles in egg masses. The second is interspecific, focusing on morphological and physiological comparisons of *T. challengeriana* (Antarctic) and a temperate congener, *T.*

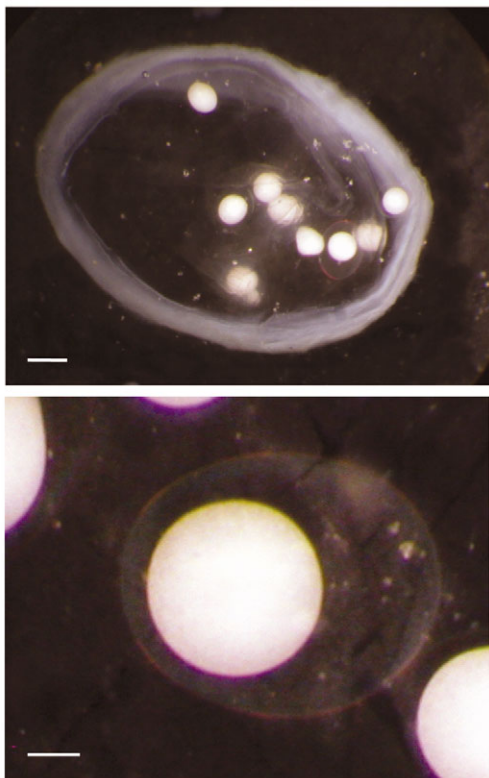

Fig. 2. (A) Cross section of egg mass of *T. challengeriana* showing central embryos (many of which have fallen out) and the robust mass wall. Scale bar, 500  $\mu\text{m}$ . (B) Single egg of *T. challengeriana* surrounded by egg capsule. Scale bar, 100  $\mu\text{m}$ .

*diomedea*. Although the core idea of the model – differential temperature sensitivity of  $\text{O}_2$  consumption versus transport – was supported, the data provided several surprises that were only partially resolved by the model.

#### Intraspecific effects of warming on oxygen in egg masses

Metabolic rates of Antarctic species can be quite sensitive to temperature (Bosch et al., 1987; Stanwell-Smith and Peck, 1998; Peck and Prothero-Thomas, 2002), though the degree of sensitivity varies among species. The strong effect of temperature on  $\text{O}_2$  consumption by embryos of *T. challengeriana* – coupled to temperature insensitivity of  $\text{O}_2$  diffusion coefficients (Woods and Moran 2008) – suggested that egg-mass  $\text{O}_2$  profiles should be affected by even small changes in temperature. This prediction, however, was refuted by both direct measurement (Fig. 4) and model simulation (Fig. 5). A resolution can be found in the very low metabolic density (per embryo metabolic rate  $\times$  embryo density) of *T. challengeriana* egg masses. In particular, low metabolic density gave trivially small  $\text{O}_2$  drawdown under cold (natural) conditions, and even large factorial increases in  $\text{O}_2$  consumption caused little additional drawdown (Fig. 5). An implication is that increasing sea temperatures could increase development rates without offsetting costs from hypoxia. For example, if metabolic rate and development rate are coupled, a  $3^\circ\text{C}$  rise in temperature could halve time to hatching. Whether this increase would be beneficial is unclear; generation times would shorten but shifts in hatch timing could result, e.g. in mismatches with seasonal food availability (Rivkin 1991; Both et al., 2006).

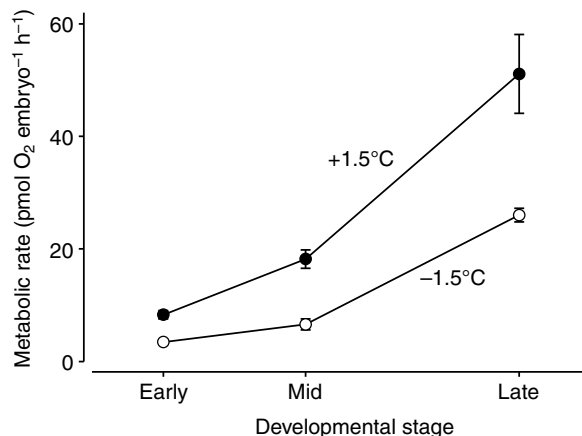

Fig. 3. Metabolic rates of early, mid- and late-stage embryos of *T. challengeriana* at two different temperatures. Each point and its associated error bars represent the slope (and error) of a linear regression of oxygen consumption versus number of embryos per vial (6–8 vials per point). See Marsh and Manahan (Marsh and Manahan, 1999) for details of the method.  $Q_{10}$  values for metabolism were 18.8, 30.0 and 9.6 for early-, mid- and late-stage embryos, respectively.

#### Interspecific differences between Antarctic and temperate *Tritonia* species

The temperature difference between the Antarctic site (shallow subtidal near McMurdo Station) and the temperate site (Friday Harbor Labs) is  $10\text{--}14^\circ\text{C}$ . The model predicts that, all else being equal, Antarctic egg masses will have higher  $\text{O}_2$  levels, be thicker, contain embryos at higher densities, and exhibit tougher egg-mass gel that is less permeable to  $\text{O}_2$ , without incurring increased  $\text{O}_2$  deficits. Only two of these four predictions were supported.

The supported predictions were  $\text{O}_2$  levels in the egg mass and egg mass size. At ambient environmental temperatures ( $-1.5^\circ\text{C}$ ), egg masses of *T. challengeriana* contained high  $\text{O}_2$  levels (Fig. 4) across all stages of development. Warming induced slightly steeper  $\text{O}_2$  gradients, but levels never dropped below 17 kPa ( $\sim 75\%$  of air saturation). By contrast, warming egg masses of the temperate *T. diomedea* gave areas of extreme hypoxia and anoxia (Moran and Woods, 2007). High  $\text{O}_2$  in egg masses of *T. challengeriana* were attributable to moderate per-embryo  $\text{O}_2$  demand at Antarctic temperatures coupled to very low embryo density. Supporting the prediction that Antarctic egg masses should be large, we found that egg masses of *T. challengeriana* were on average twice the diameter of those of *T. diomedea* (radii of 1.5 and 0.8 mm, respectively). This pattern is consistent with the phenomenon of polar gigantism (Chapelle and Peck, 1999), and may be related to release from  $\text{O}_2$  constraints.

Support for both predictions – higher  $\text{O}_2$  levels and larger egg-mass size – suggests, however, that size of Antarctic masses has not increased to the extent that would be permitted by relief from  $\text{O}_2$  constraints. The model offers a way to evaluate this idea quantitatively. For example, the model indicates that an egg mass of *T. challengeriana* containing mid-stage embryos could be sixfold thicker (18 mm) and still have some  $\text{O}_2$  at its center. Under conditions of higher  $\text{O}_2$  demand, i.e. late stage embryos at  $+1.5^\circ\text{C}$ , egg masses could still be two- to threefold thicker before the onset of central anoxia. At their actual sizes, therefore, it appears that natural masses are ‘overconstructed’ with regard to  $\text{O}_2$  supply to embryos (see also Seymour and Bradford, 1995). Several processes may explain this pattern. First, laboratory experiments were

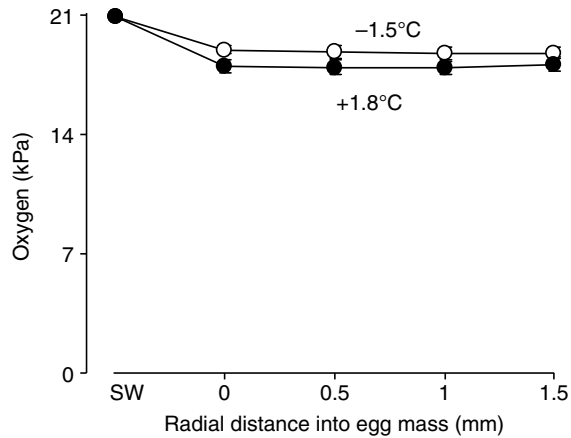

Fig. 4. Oxygen profiles in paired pieces of egg mass ( $N=7$ ) from *T. challengeriana* at two temperatures. Values are means  $\pm$  s.e.m., just visible behind the data symbols. SW, air-bubbled seawater around the egg mass.

performed in full  $O_2$  saturation with stirring; in the field,  $O_2$  concentrations and flow may be lower. Respiration by other neighboring organisms may draw local oxygen levels down further. Direct field measurements of  $O_2$  concentration in egg masses *in situ* would constitute a good test. Second, egg-mass cords often fold back on themselves or are laid in closely apposed spirals (see Fig. 1). Third, Antarctic embryos themselves may be more sensitive to low  $O_2$  availability than are temperate embryos. Fourth, morphological constraints in the adult reproductive tract may preclude generating larger-diameter egg masses. None of these possibilities has been tested.

Now consider the unsupported predictions, embryo density and gel impermeability. Contrary to expectation, we found that embryos in Antarctic species were 23-fold *less* dense than their temperate congener (9.2 embryos  $mm^{-3}$  compared with 215.2 embryos  $mm^{-3}$  for *T. diomedea*). A likely proximate explanation stems from embryo sizes of the two species. Embryos of *T. challengeriana* were >32-fold larger (by volume) than embryos of *T. diomedea*, and single embryos were contained in very large ( $\sim 500 \mu m$  diameter) egg capsules. Masses of *T. challengeriana* also had stiffer, thicker ( $\sim 183 \mu m$ ) egg-mass walls, and tightly packed capsules within. We calculated the packing density of embryos by measuring the volume of the internal cavity of each mass and the volume of embryos contained in it, and found that *T. challengeriana* capsules filled an estimated 83.0% ( $\pm 8.0\%$ ) of available space. The theoretical maximum packing of jammed disordered ellipsoids is  $\sim 74\%$  (Donev et al., 2004); thus, while capsules were somewhat flexible and could clearly be packed at high densities, embryos could not occur at much higher densities without reduction in capsule size. The functional role of large capsules is unknown, but their size places a limit on embryo density that is lower than the theoretical limit imposed by  $O_2$  supply–demand dynamics in our model.

The second prediction, that Antarctic egg masses would use  $O_2$  surplus to construct especially tough egg-mass gel that was less oxygen-permeable, was also rejected. The logic was that (1) predation is important in Antarctic ecosystems; (2) slow-developing embryos would need substantial protection, i.e. tough egg-mass walls, if they were to survive to hatching; and (3) construction of tough walls would result in reduced permeability to  $O_2$ . Egg mass walls of *T. challengeriana* indeed appeared tougher than those of

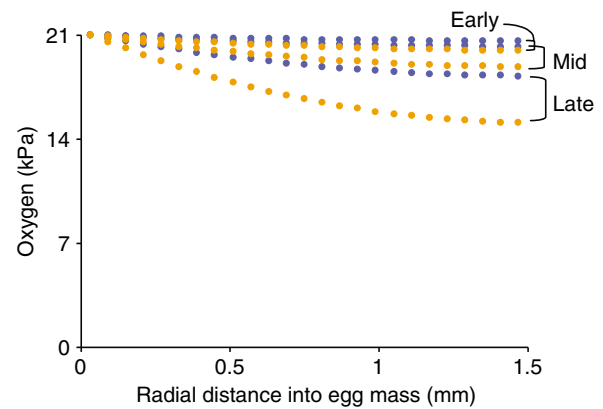

Fig. 5. Simulated radial  $O_2$  profiles in egg masses of *T. challengeriana*. Early, mid and late refer to developmental stage. Blue indicates simulations based on measured values at  $-1.5^\circ C$ , and orange indicates values at  $+1.5^\circ C$ .

*T. diomedea*. However, direct measurement of  $O_2$  diffusion coefficients ( $D$ ) in intact egg masses of *T. challengeriana* (Woods and Moran, 2008) showed that  $D$  was almost as high as in pure seawater. Egg-mass wall toughness may be irrelevant to predation risk if masses are chemically defended, as some Antarctic adult nudibranchs appear to be (Bryan et al., 1998).

#### Physiology of Antarctic egg masses: conclusions and caveats

Antarctic egg masses were thicker ( $2\times$ ) than those of a temperate congener and had high  $O_2$  levels throughout, at least under laboratory conditions. In addition, embryos in the Antarctic masses were much larger ( $32\times$ ) than the temperate congener. It is possible that large embryo size is facilitated by release from  $O_2$  constraints. In this aspect, our focus on egg-mass size may be too narrow; perhaps the appropriate organizational level is on embryos and the  $O_2$  gradients surrounding them (Seymour and White, 2006). We are presently developing new analyses to evaluate this idea.

An obvious caveat is that our conclusions are drawn in part from a two-species comparison, so that firm evolutionary conclusions are impossible (Garland and Adolph, 1994). We focused instead on developing detailed physiological and morphological datasets grounded in a modeling context. Our evolutionary conclusions are thus subject to additional, ongoing studies of larger species sets.

A second caveat concerns implicit connections between  $O_2$  and egg-mass structure and function. Other factors unrelated to  $O_2$  may also be at work. For example, predation plays an important role in structuring Antarctic benthic ecosystems (Dearborn, 1977; Dayton et al., 1994; McClintock, 1994; McClintock et al., 2005). High predation rates on early life-history stages are thought to select against strategies in which reproductive effort is packaged into few, large clutches rather than more numerous, smaller ones (Smith and Fretwell, 1974). Thus, production of thick masses in the Antarctic, which our model suggests is physiologically possible, might be disadvantageous because of the high probability that a parent's entire reproductive output could be consumed by a single predator (although parents could avoid this problem by producing short, thick masses). Likewise, if predation rates on Antarctic masses are high, any reduction of internal  $O_2$  concentrations may be detrimental if it prolongs development and increases vulnerability to predation.



We thank the directors and staff of both the Friday Harbor Laboratories and McMurdo Station for support. SCUBA support was provided by two fearless Dive Safety Officers – Rob Robbins (McMurdo) and Pema Kitaef (FHL) – and their help is greatly appreciated. Others provided invaluable laboratory help and additional SCUBA assistance, including Bruce Miller, Jim Murray, Erika Schreiber and Jon Sprague. Two anonymous reviewers significantly clarified the manuscript. We also thank Dr Creagh Breuner and Dr Peter Marko for extraordinary logistical support while the authors were in Antarctica. This work was supported by the National Science Foundation (ANT-0440577 to H.A.W. and ANT-0551969 to A.L.M.).

## REFERENCES

- Barnes, D. K. A. and Bullough, L. W.** (1996). Some observations on the diet and distribution of nudibranchs at Signy Island, Antarctica. *J. Molluscan Stud.* **62**, 281-287.
- Booth, D. T.** (1995). Oxygen availability and embryonic development in sand snail (*Polinices sordidus*) egg masses. *J. Exp. Biol.* **198**, 241-247.
- Bosch, I., Beauchamp, K. A., Steele, M. E. and Pearse, J. S.** (1987). Development, metamorphosis, and seasonal abundance of embryos and larvae of the Antarctic sea-urchin *Sterechinus neumayeri*. *Biol. Bull.* **173**, 126-135.
- Both, C., Bouwhuis, S., Lessells, C. M. and Visser, M. E.** (2006). Climate change and population declines in a long-distance migratory bird. *Nature* **441**, 81-83.
- Bryan, P. J., McClintock, J. B. and Baker, B. J.** (1998). Population biology and antipredator defenses of the shallow water Antarctic nudibranch *Tritoniella belli*. *Mar. Biol.* **132**, 259-266.
- Chapelle, G. and Peck, L. S.** (1999). Polar gigantism dictated by oxygen availability. *Nature* **399**, 114-115.
- Clarke, A. and Johnston, N.** (1999). Scaling of metabolic rate and temperature in teleost fish. *J. Anim. Ecol.* **68**, 893-905.
- Cocca, E., Ratnayake-Lecamwasam, M., Parker, S. K., Camardella, L., Ciaramella, M., di Prisco, G. and Detrich, H. W.** (1995). Genomic remnants of alpha-globin genes in the hemoglobinless antarctic icefishes. *Proc. Natl. Acad. Sci. USA* **92**, 1817-1821.
- Cohen, C. S. and Strathmann, R. R.** (1996). Embryos at the edge of tolerance: effects of environment and structure of egg masses on supply of oxygen to embryos. *Biol. Bull.* **190**, 8-15.
- Dayton, P. K., Mordida, B. J. and Bacon, E.** (1994). Polar marine communities. *Am. Zool.* **34**, 90-99.
- Dearborn, J. H.** (1977). Food and feeding characteristics of antarctic asteroids and ophiuroids. In *Adaptations within Antarctic Ecosystems* (ed. G. A. Llano), pp. 293-326. Houston, TX: Gulf.
- Dejours, P.** (1981). *Principles of Comparative Respiratory Biology*. Amsterdam: Elsevier.
- Donev, A., Cisse, I., Sachs, D., Variano, E. A., Stillinger, F. H., Connelly, R., Torquato, S. and Chaikin, P. M.** (2004). Improving the density of jammed disordered packings using ellipsoids. *Science* **303**, 990-993.
- Eastman, J. T.** (1993). *Antarctic Fish Biology: Evolution in a Unique Environment*. San Diego, CA: Academic Press.
- Fernández, M., Ruiz-Tagle, N., Cifuentes, S., Pörtner, H. O. and Arntz, W.** (2003). Oxygen-dependent asynchrony of embryonic development in embryo masses of brachyuran crabs. *Mar. Biol.* **142**, 559-565.
- Garland, T., Jr and Adolph, S. C.** (1994). Why not to do two-species comparative studies: limitations on inferring adaptation. *Physiol. Zool.* **67**, 797-828.
- Hurst, A.** (1967). The egg masses and veligers of thirty northeast Pacific opisthobranchs. *Veliger* **9**, 255-288.
- Kempf, S. C. and Willows, A. O. D.** (1977). Laboratory culture of the nudibranch *Tritonia diomedea* Bergh (Tritonidae: Opisthobranchia) and some aspects of its behavioral development. *J. Exp. Mar. Biol. Ecol.* **30**, 261-276.
- Lee, C. E. and Strathmann, R. R.** (1998). Scaling of gelatinous clutches: effects of siblings' competition for oxygen on clutch size and parental investment per offspring. *Am. Nat.* **151**, 293-310.
- Littlepage, J. L.** (1965). Oceanographic investigations in McMurdo Sounds. *Antarct. Res. Ser.* **5**, 1-37.
- Marsh, A. G. and Manahan, D. T.** (1999). Accurate measurements of the respiration rates of marine invertebrate embryos and larvae. *Mar. Ecol. Prog. Ser.* **184**, 1-10.
- McClintock, J. B.** (1994). The trophic biology of antarctic echinoderms. *Mar. Ecol. Prog. Ser.* **111**, 191-202.
- McClintock, J. B., Baker, B. J., Slattery, M., Heine, J. N., Bryan, P. J., Yoshida, W., Davies-Coleman, M. T. and Faulkner, D. J.** (1994). Chemical defense of common Antarctic shallow-water nudibranch *Tritoniella belli* Eliot (Mollusca: Tritonidae) and its prey, *Clavularia frankliniana* Rouel (Cnidaria: Octocorallia). *J. Chem. Ecol.* **20**, 3361-3371.
- McClintock, J. B., Amsler, C. D., Baker, B. J. and van Soest, R. W. M.** (2005). Ecology of antarctic marine sponges: an overview. *Integr. Comp. Biol.* **45**, 359-368.
- McDonald, G. R.** (1983). A review of the nudibranchs of the California coast. *Malacologia* **24**, 114-276.
- McDonald, G. R. and Nybakken, J. W.** (1980). *Guide to the Nudibranchs of California (Including Most Species Found from Alaska to Oregon)*. Melbourne, FL: American Malacologists.
- Mitchell, N. J. and Seymour, R. S.** (2003). The effects of nest temperature, nest substrate, and clutch size on the oxygenation of embryos and larvae of the Australian moss frog, *Bryobatrachus nimbus*. *Physiol. Biochem. Zool.* **76**, 60-71.
- Moran, A. L. and Emler, R. B.** (2001). Offspring size and performance in variable environments: field studies on a marine snail. *Ecology* **82**, 1597-1612.
- Moran, A. L. and Woods, H. A.** (2007). Oxygen in egg masses: interactive effects of temperature, age, and egg-mass morphology on oxygen supply to embryos. *J. Exp. Biol.* **210**, 722-731.
- Odhner, N. H.** (1926). Die Opisthobranchien. In *Further Zoological Research of the Swedish Antarctic Expedition 1901-1903*. Vol. 2, pp. 1-100. Stockholm: P. A. Norstedt & Soner.
- Palumbi, S. R. and Johnson, B. A.** (1982). A note on the influence of life-history stage on metabolic adaptation: the responses of *Limulus* eggs and larvae to hypoxia. In *Physiology and Biology of Horseshoe Crabs: Studies on Normal and Environmentally Stressed Animals*, pp. 115-124. New York: Alan R. Liss.
- Pechenik, J. A.** (1979). Role of encapsulation in invertebrate life histories. *Am. Nat.* **114**, 859-870.
- Pechenik, J. A.** (1999). On the advantages and disadvantages of larval stages in benthic marine invertebrate life cycles. *Mar. Ecol. Prog. Ser.* **177**, 269-297.
- Peck, L. S.** (2002). Ecophysiology of Antarctic marine ectotherms: limits to life. *Polar Biol.* **25**, 31-40.
- Peck, L. S. and Conway, L. Z.** (2000). The myth of metabolic cold adaptation: oxygen consumption in stenothermal Antarctic bivalves. In *Evolutionary Biology of the Bivalvia (Geological Society of London Special Publication 177)* (ed. E. Harper and A. J. Crame), pp. 441-450. Cambridge: Cambridge University Press.
- Peck, L. S. and Prothero-Thomas, E.** (2002). Temperature effects on the metabolism of larvae of the Antarctic starfish, *Odontaster validus*, using a novel micro-respirometry method. *Mar. Biol.* **141**, 271-276.
- Pörtner, H. O.** (2001). Climate change and temperature-dependent biogeography: oxygen limitation of thermal tolerance in animals. *Naturwissenschaften* **88**, 137-146.
- Pörtner, H. O.** (2002). Climate variation and the physiological basis of temperature dependent biogeography: systemic to molecular hierarchy of thermal tolerance in animals. *Comp. Biochem. Physiol.* **132A**, 739-761.
- Przeslawski, R.** (2004). Review of environmental effects on intertidal molluscan egg mass development and mortality. *Molluscan Res.* **24**, 43-63.
- Rawlings, T. A.** (1999). Adaptations to physical stresses in the intertidal zone: the egg capsules of neogastropod molluscs. *Am. Zool.* **39**, 230-243.
- Rivkin, R. R.** (1991). Seasonal patterns of planktonic production in McMurdo Sound, Antarctica. *Am. Zool.* **31**, 65-80.
- Roughgarden, J., Gaines, S. D. and Pacala, S.** (1987). Supply side ecology: the role of physical transport processes. In *Organization of Communities: Past and Present (Proceedings of the British Ecological Society Symposium, Aberystwyth, Wales)* (ed. P. Giller and J. Gee), pp. 459-486. London: Blackwell Scientific.
- Rumrill, S. S.** (1990). Natural mortality of invertebrate larvae. *Ophelia* **32**, 163-198.
- Ruud, J. T.** (1954). Vertebrates without erythrocytes and blood pigment. *Nature* **173**, 848-850.
- Schrödl, M.** (2003). *Sea Slugs of Southern South America. Systematics, Biogeography and Biology of Chilean and Magellanic Nudipleura (Mollusca: Opisthobranchia)*. Hackenheim: ConchBooks.
- Seymour, R. S. and Bradford, D. F.** (1995). Respiration of amphibian eggs. *Physiol. Zool.* **68**, 1-25.
- Seymour, R. S. and White, C. R.** (2006). Models for embryonic respiration. In *Comparative Developmental Physiology: Contributions, Tools, and Trends* (ed. S. J. Warburton, W. W. Burggren, B. Pelster, C. L. Reiber and J. Spicer), pp. 41-57. Oxford: Oxford University Press.
- Seymour, R. S., Mahony, M. J. and Knowles, R.** (1995). Respiration of embryos and larvae of the terrestrially breeding frog, *Kyarranus loveridgei*. *Herpetologica* **51**, 369-376.
- Sidell, B. D.** (2000). Life at body temperatures of below 0 degrees C: the physiology and biochemistry of Antarctic fishes. *Gravit. Space Biol. Bull.* **13**, 25-34.
- Smith, C. C. and Fretwell, S. D.** (1974). The optimal balance between size and number of offspring. *Am. Nat.* **154**, 333-340.
- Stanwell-Smith, D. and Peck, L. S.** (1998). Temperature and embryonic development in relation to spawning and field occurrence of larvae of three Antarctic echinoderms. *Biol. Bull.* **194**, 44-52.
- Strathmann, R. R.** (1985). Feeding and nonfeeding larval development and life-history evolution in marine invertebrates. *Annu. Rev. Ecol. Syst.* **16**, 339-361.
- Strathmann, R. R.** (2000). Form, function, and embryonic migration in large gelatinous egg masses or arenicolid worms. *Invert. Biol.* **119**, 319-328.
- Strathmann, R. R. and Strathmann, M. F.** (1995). Oxygen supply and limits on aggregation of embryos. *J. Mar. Biol. Assoc. U.K.* **75**, 413-428.
- Tang, P.-S. and Gerard, R. W.** (1932). The oxygen tension-oxygen consumption curve of fertilized *Arbacia* eggs. *J. Cell. Comp. Physiol.* **1**, 503-513.
- Taylor, F. H. C.** (1971). Variation in hatching success in Pacific herring (*Clupea pallasii*) eggs with water depth, temperature, salinity, and egg mass thickness. *Rapp. P.-v. Reun. Cons. Int. Explor. Mer.* **160**, 34-41.
- Thorson, G.** (1946). Reproduction and larval development of Danish marine bottom invertebrates. *Medd. Komm. Danmarks Fisk. Havunders. Ser. Plankton* **4**, 1-523.
- Underwood, A. J. and Keough, M. J.** (2001). Supply side ecology: the nature and consequences of variations in recruitment of intertidal organisms. In *Marine Community Ecology* (ed. M. D. Bertness, S. D. Gaines and M. Hay), pp. 183-200. Sunderland, MA: Sinauer Associates.
- Wägele, H.** (1995). The morphology and taxonomy of the Antarctic species of *Tritonia* Cuvier, 1797 (Nudibranchia, Dendronotoidea). *Zool. J. Linn. Soc.* **113**, 21-46.
- Woods, H. A.** (1999). Egg-mass size and cell size: effects of temperature on oxygen distribution. *Am. Zool.* **39**, 244-252.
- Woods, H. A. and DeSilets, R. L., Jr** (1997). Egg-mass gel of *Melanochlamys diomedea* (Bergh) protects embryos from low salinity. *Biol. Bull.* **193**, 341-349.
- Woods H. A. and Moran, A. L.** (2008). Oxygen profiles in egg masses predicted from a diffusion-reaction model. *J. Exp. Biol.* **211**, 790-797.
- Yanigasawa, T.** (1975). Respiration and energy metabolism. In *The Sea Urchin Embryo* (ed. G. Czihak), pp. 510-549. New York: Springer.
